# Supplementary material
Source: MDPI journal article supplement (https://www.mdpi.com/2673-8112/3/12/118)
Supplement: s1 [file s1]

## **Questionnaire survey of urticaria patients infected with the SARS-CoV-2**

This survey aims to understand the basic information of urticaria patients infected with the new coronavirus, as well as the severity of the new SARS-CoV-2 infection and urticaria, in order to study the impact of the SARS-CoV-2 infection on the condition of urticaria and better help patients recover. This questionnaire is anonymously to protect the privacy of the filler, please fill in the chronic urticaria patients who have been infected with SARS-CoV-2 infection according to their actual situation:

### **1. Basic information of patients and vaccination status**

1. Your gender:

Man

Woman

2. Your age: \_\_\_\_\_

3. What are your previous underlying medical conditions: No underlying medical conditions

Hypertension

Diabetes

Coronary heart disease

Chronic obstructive pulmonary disease

Allergic diseases (such as allergic rhinitis, allergic asthma, etc.)

Others, please fill in

4. Have you been vaccinated:

Be

Not

5. Please choose, how many doses of the SARS-CoV-2 vaccine you received:

One shot of the SARS-CoV-2 vaccine (adenovirus vector vaccine)

Two doses of SARS-CoV-2 vaccine (inactivated vaccine)

Three doses of SARS-CoV-2 vaccine (recombinant protein vaccine)

Inhaled vaccines

### **2. Symptoms during positive infection and drug use**

6. Have you ever been diagnosed with COVID

Be

Not

7. Here's how you're diagnosed

Nucleic acid testing

Antigen testing

Suspected symptom, undetected

8. What are your main symptoms after SARS-CoV-2 infection:

Hyperpyrexia

Diarrhoea

Stuffy nose

Sore throat

Headache

Dizzy

Weak  
Conjunctivitis  
Joint pain  
Muscle pain  
Dyspnea  
Loss of taste  
Decreased sense of smell  
Depressed and depressed  
Feeling restless, worried, and irritable  
Sleep disturbances (eg, difficulty falling asleep, dreaming, early awakening).  
Others, please specify

9. Your overall self-perception of the symptoms of SARS-CoV-2 infection is

Symptoms are mild  
Symptoms are moderate  
Symptoms are severe  
Symptoms are extremely severe

10. Whether you have been treated after SARS-CoV-2 infection

Be

Not

11. What treatments you had after SARS-CoV-2 infection

Western medicine treatment (such as fever reducers, cough suppressants, expectorants, etc.)

Proprietary Chinese medicine treatment (such as Lianhua Qingwen capsules, Banlan root granules, bezoar Shangqing pills, etc.)

Traditional Chinese medicine treatments (e.g. Chinese medicine, acupuncture, gua sha, cupping, etc.)

Hospitalization

For other treatments, please fill in

12. How many days have you experienced from the onset of SARS-CoV-2 infection to the recovery

Fill in the blanks

### **3. The severity of urticaria and the impact of SARS-CoV-2 infection on urticaria**

9. Whether there are predisposing factors for the development of urticaria (multiple choices).

No obvious trigger

Contact with hot or cold objects

Ultraviolet

Scratched by objects

Exercise or eating after exercise

Emotional factors

Infection with coronavirus

Other factors

10. How long has the course of chronic urticaria been since the first onset

Within 6 weeks

6 weeks - 2 years

2-5 years

More than 5 years

11. When did you first have urticaria

Before SARS-CoV-2 infection

During SARS-CoV-2 infection After SARS-CoV-2 infection There was, but it was cured before SARS-CoV-2 infection

8. Whether the effect of taking drugs to relieve symptoms of SARS-CoV-2 infection during SARS-CoV-2 infection on the onset of urticaria (including wheal area, itch index, etc.):

Aggravate

Ease

No impact

12. The wheals before SARS-CoV-2 infection

0 None

1 light (< 20 pieces/day) or area < eggs

2 Moderate (20-50 capsules/day)

3. Severe (> 50 capsules / day) or large area of the whole body

13. Your itching episode before SARS-CoV-2 infection0 None

1 mild (yes, but not irritable or troublesome)

2 moderate (troublesome, but does not affect life sleep)

3 severe (severe itching, obviously affecting life and sleep)

14. The occurrence of wheals during SARS-CoV-2 infection

0 None

1 light (< 20 pieces/day) or area < eggs

2 Moderate (20-50 capsules/day)

3. Severe (> 50 capsules / day) or large area of the whole body

15. Episodes of itching during SARS-CoV-2 infection

0 None

1 mild (yes, but not irritable or troublesome)

2 moderate (troublesome, but does not affect life sleep)

3 severe (severe itching, obviously affecting life and sleep)

16. The onset of wheals after SARS-CoV-2 infection0 None

1 light (< 20 pieces/day) or area < eggs

2 Moderate (20-50 capsules/day)

3. Severe (> 50 capsules / day) or large area of the whole body

17. The onset of itching after SARS-CoV-2 infection

0 None

1 mild (yes, but not irritable or troublesome)

2 moderate (troublesome, but does not affect life sleep)

3 severe (severe itching, obviously affecting life and sleep)

18. Specific treatment of urticaria before you contracted new crown pneumonia (except for patients who did not have urticaria before new crown).

Medicinal herb

Western

Acupuncture

Other

No

19. Specific treatment for hives during SARS-CoV-2 infection

Medicinal herb

Western

Acupuncture

Other

No

20. Whether there is a change in the frequency of use of Western medicine

Increase

Unchanged

Decrease

21. Specific treatment for urticaria after SARS-CoV-2 infection

Medicinal herb

Western

Acupuncture

Other

No

22. Whether there is a change in the frequency of use of Western medicine

Increase

Unchanged

Decrease
